# Supplementary material for: Single use versus reusable catheters in intermittent catheterisation for treatment of urinary retention: a protocol for a multicentre, prospective, randomised controlled, non-inferiority trial (COMPaRE)
Source: HighWire-hosted journal article supplement (doi:10.1136/bmjopen-2021-056649), 2022-04-01
Supplement: bmjopen-2021-056649supp001_data_supplement.pdf [file bmjopen-2021-056649supp001_data_supplement.pdf]

Subject information sheet  
COMPaRE

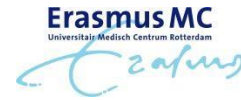

## Supplementary 1: Subject informed consent form

### ***"The reuse of catheters in patients who catheterize intermittently"***

- I have read the information sheet. I was able to ask questions. My questions have been answered well enough. I had enough time to decide if I want to participate.
- I know that taking part is voluntary. I also know that I can decide at any time not to participate or to stop the study. I do not have to explain why.
- I give consent to inform the general practitioner/specialist(s) who treats me that I am participating in this study and that I will potentially use a reusable catheter.
- I give consent to request information from my general practitioner/specialist(s) about the results from urine analysis and side effects.
- I give consent to request information from the laboratory where the urine analyses were performed.
- I give consent to collect and use my data and body material to answer the research question of this study.
- I know that for the monitoring of this research some people can get access to all my data. These people are listed in this information sheet. I give consent for access by these people.
  
- I give consent to keep my personal information for a period of 15 years and to use it for future research in the field of my condition and/or the investigated treatment method.
  - Yes**
  - No**
  
- I give consent to have my body material stored after this study for use in other research, as stated in the information sheet.
  - Yes**
  - No**
  
- I give consent to ask me after this study if I want to participate in a follow-up study.
  - Yes**
  - No**
  
- I want to participate in this study.

Name of the subject:

Signature:

Date : \_\_ / \_\_ / \_\_

-----

OZBS62.18167 / NL68597.078.19 – version 5.0 dd 18<sup>th</sup> November

2019 Page 1 out of 2 Subject information sheet  
COMPARE

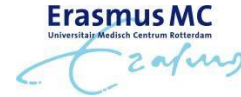

I declare that I have fully informed this subject about the above study.

If any information becomes known during the study that could influence the subject's consent, I will let them know in good time.

Investigator name (or their representative):

Signature:

Date: \_\_ / \_\_ / \_\_

-----

Additional information was given by:

Name:

Job title:

Signature:

Date: \_\_ / \_\_ / \_\_

-----

\* Delete what is not applicable.

*The subject will receive a complete information sheet, together with a signed version of the consent form.*

OZBS62.18167 / NL68597.078.19 – version 5.0 dd 18<sup>th</sup> November
